# Supplementary material for: Pharmaceutical Incompatibility of Lubricating Gel Formulation Reduces Antibacterial Activity of Chlorhexidine Gluconate: In Vitro Study in Northern Thailand
Source: MDPI journal article supplement (doi:10.3390/ijerph191912285), 2022-09-27
Supplement: s1 [file s1]

## Supplementary Material

**Table S1.** Correlation coefficients ( $r^2$ ) between Type of lubricating gel/Percent reduction of CHG on Log reduction of *S. aureus* and *E. coli*.

|                          |               | <i>S. aureus</i> |           |           |          | <i>E. coli</i> |           |           |           |
|--------------------------|---------------|------------------|-----------|-----------|----------|----------------|-----------|-----------|-----------|
|                          |               | 1 min            | 5 min     | 10 min    | 15 min   | 1 min          | 5 min     | 10 min    | 15 min    |
| Type of lubricating gel  |               | 0.824 **         | 0.886 **  | 0.892 **  | 0.898 ** | 0.828 **       | 0.869 **  | 0.869 **  | 0.874 **  |
| Percent reduction of CHG | Exposure time |                  |           |           |          |                |           |           |           |
|                          | 1 min         | -0.870 **        |           |           |          | -0.836 **      |           |           |           |
|                          | 5 min         |                  | -0.948 ** |           |          |                | -0.928 ** |           |           |
|                          | 10 min        |                  |           | -0.938 ** |          |                |           | -0.917 ** |           |
|                          |               |                  |           |           | -0.930   |                |           |           | -0.915 ** |

\*\* . Correlation is significant at the 0.01 level (2-tailed).

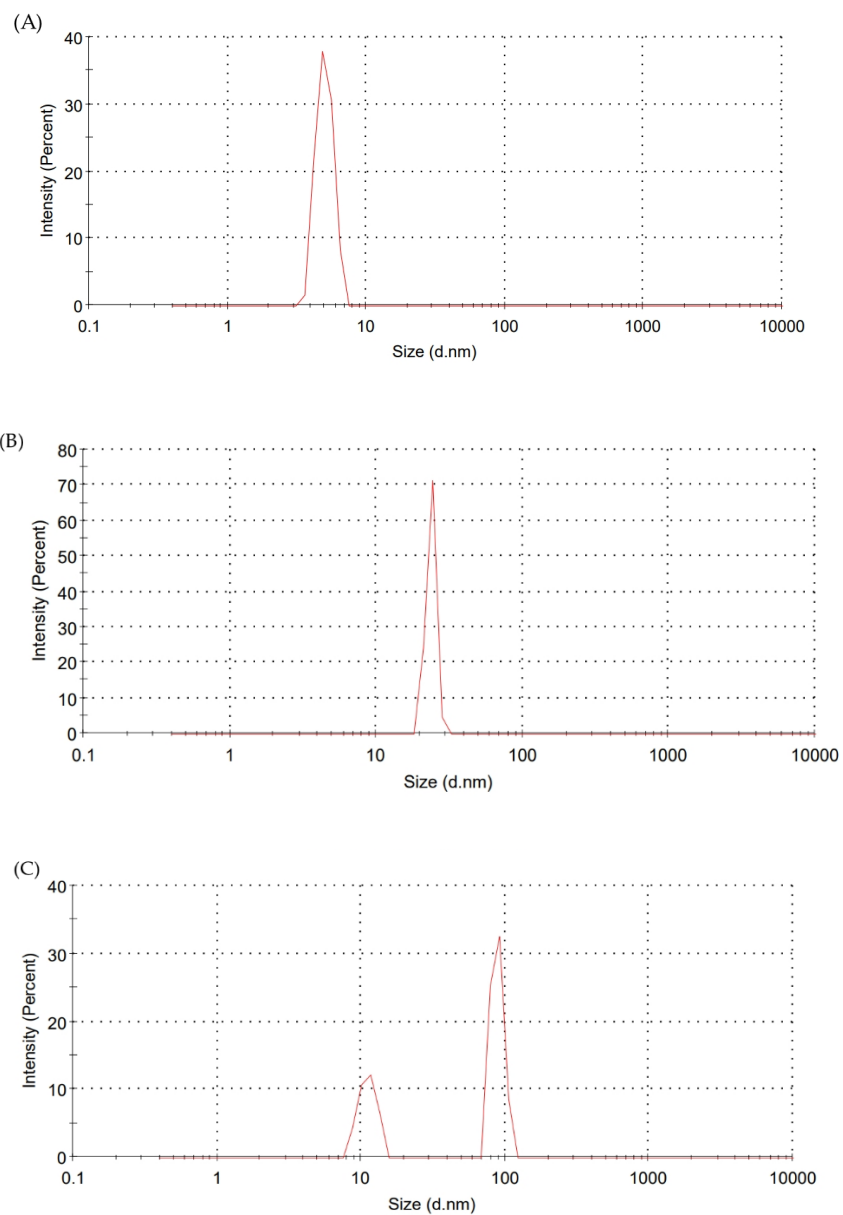

**Figure S1.** The particle size distribution from the dynamic light scattering of (A) CHG, (B) lubricant gel N2 and (C) lubricant gel N2 exposure to CHG.
